# Supplementary material
Source: Springer Nature journal article supplement (https://www.springermedizin.de/resource/supplementary/12913_2011_1974_MOESM2_ESM.pdf/9530700)

# Figures

Figure 1 - MRSA Model of Learning & Adaptation

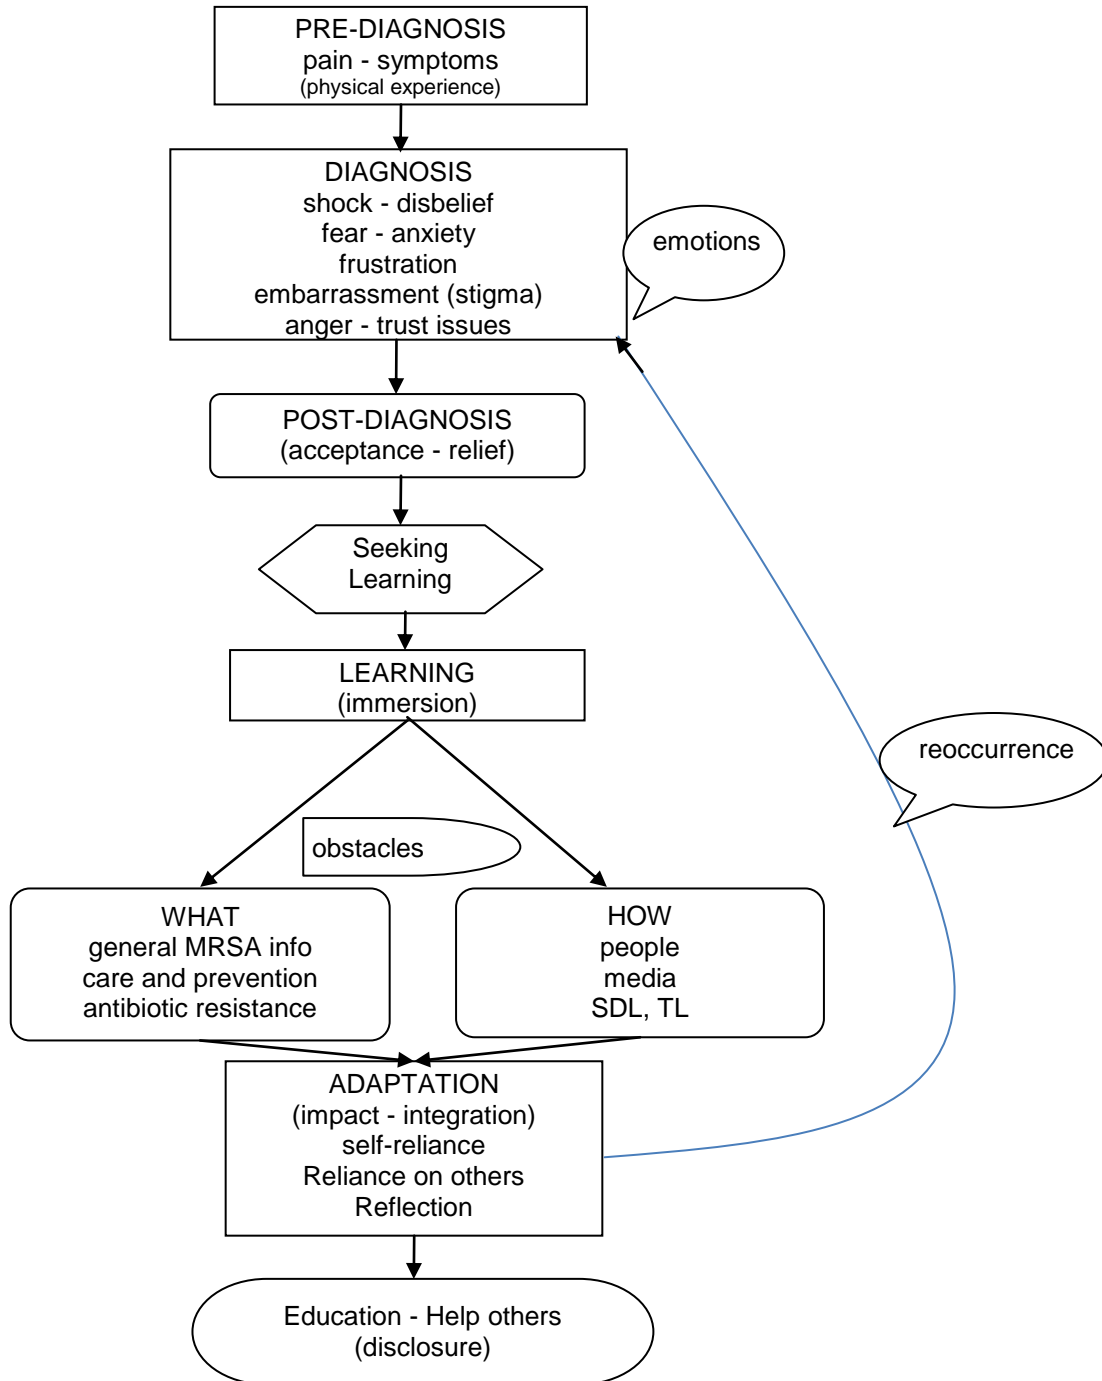

Supplement: MOESM2 [file 9530700]
